# Theory of mechano-chemical patterning in biphasic biological tissues

Pierre Recho<sup>\*§</sup>, Adrien Hallou<sup>†§</sup> and Edouard Hannezo<sup>‡§</sup>

**The formation of self-organized patterns is key to the morphogenesis of multicellular organisms, although a comprehensive theory of biological pattern formation is still lacking. Here, we propose a biologically realistic and unifying approach to emergent pattern formation. Our biphasic model of multicellular tissues incorporates turnover and transport of morphogens controlling cell differentiation and tissue mechanics in a single framework, where one tissue phase consists of a poroelastic network made of cells and the other is the extracellular fluid permeating between cells. While this model encompasses previous theories approximating tissues to inert monophasic media, such as Turing's reaction-diffusion model, it overcomes some of their key limitations permitting pattern formation via any two-species biochemical kinetics thanks to mechanically induced cross-diffusion flows. Moreover, we unravel a qualitatively different advection-driven instability which allows for the formation of patterns with a single morphogen and which single mode pattern scales with tissue size. We discuss the potential relevance of these findings for tissue morphogenesis.**

How symmetry is broken in the early embryo to give rise to a complex organism, is a central question in developmental biology. To address this question, Alan Turing proposed an elegant mathematical model where two reactants can spontaneously form periodic spatial patterns through an instability driven by their difference in diffusivity [1]. Molecular evidence of such a reaction-diffusion scheme *in vivo* remained long elusive, until pairs of activator-inhibitor morphogens were proposed to be responsible of pattern formation in various embryonic tissues [2–10]. Interestingly, these studies also highlight some theoretical and practical limitations of existing reaction-diffusion models, including the fact that Turing patterns require the inhibitor to diffuse at least one order of magnitude faster than the activator ( $D_I/D_A > 10$ ) [3], although most morphogens are small proteins of similar molecular weights, implying that  $D_I/D_A \approx 1$ . As a consequence, the formation of Turing patterns *in vivo* should result from other properties of the system

such as selective morphogen immobilisation [11–13] or active transport [14] as demonstrated in synthetic systems. Moreover, reaction-diffusion models of pattern formation entail a number of restrictions regarding the number and interactions of morphogens, and pattern scaling with respect to the tissue size, which have been all limiting their quantitative applicability *in vivo* [15]. While the genetic and biochemical aspects of developmental pattern formation have been the focus of most investigations, the interplay between mechanics and biochemical processes in morphogenesis started to unfold following some pioneering contributions [17, 18]. The crucial role played by multiphasic tissue organisation and active cell behaviours in biological pattern formation is now an active field of research [19–24].

In this article, we derive a general mathematical formulation of tissues as active biphasic media coupled with reaction-diffusion processes, where morphogen turnover inside cells, import/export at the cell membrane and active mechanical transport in the extracellular fluid are coupled together through tissue mechanics. While encompassing classical reaction-diffusion results [1–5], for instance allowing import-export mechanisms to rescale diffusion coefficients and to form patterns with equally diffusing morphogens [12], this theory provides multiple new routes to robust pattern formation. In particular, assuming a generic coupling between intracellular morphogen concentration and poroelastic tissue mechanics, we demonstrate the existence of two fundamentally different non-Turing patterning instabilities, respectively assisted and driven by advective extracellular fluid flows, explaining pattern formation with only a single morphogen with robust scaling properties, and how patterning can be independent of underlying morphogen reaction schemes. Finally, we provide numerical simulations to verify our analytical predictions and discuss the biological relevance of such a model, and in particular, its detailed predictions that could be verified *in vivo*.

## Results

### Derivation of the model

As sketched in Fig. 1(a), we model multicellular tissues as continuum biphasic porous media of typical length  $l$ , with a first phase consisting of a poroelastic network made of adhesive cells of arbitrary shape and typical size  $l_c$  (with volume fraction  $\phi(\vec{r}, t) \in [0, 1]$ , where  $\vec{r}$  denotes the spatial position in the tissue and  $t > 0$ , the time), and a second phase of aqueous extracellular fluid permeating in-between cells in gaps of a characteristic size  $l_i$ . These two internal length scales disappear in the coarse-graining averaging over a representative volume element (RVE) of

<sup>\*</sup>LIPHY, CNRS UMR 5588 & Université Grenoble Alpes, F-38000 Grenoble, France.

<sup>†</sup>Cavendish Laboratory, Department of Physics, University of Cambridge, Cambridge, CB3 0HE, UK; Wellcome Trust/CRUK Gurdon Institute, University of Cambridge, Cambridge, CB2 1QN, UK; Wellcome Trust/MRC Stem Cell Institute, University of Cambridge, Cambridge, CB2 1QR, UK.

<sup>‡</sup>IST Austria, Am Campus 1, 3400 Klosterneuburg, Austria.

<sup>§</sup>A.H, P.R and E.H contributed equally to this work. E-mail: pierre.recho@univ-grenoble-alpes.fr, ah691@cam.ac.uk or edouard.hannezo@ist.ac.at

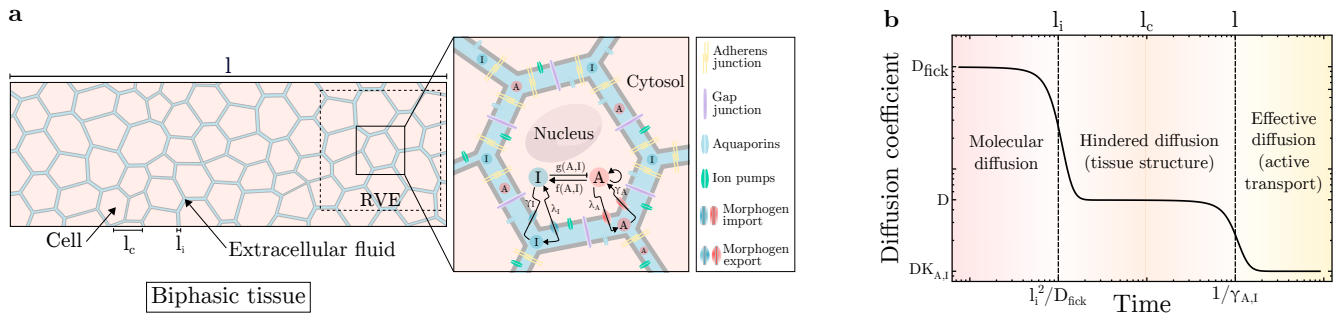

**Figure 1: Model for pattern formation in active biphasic tissues.** (a) (Left) Schematic of the model at the tissue scale. Cells form a poroelastic network, permeated by extracellular fluid, where three natural length scales can be defined: the interstitial space size ( $l_i$ ), the characteristic cell size ( $l_c$ ) and the tissue size ( $l$ ). The representative volume element (RVE) defines a spatial scale,  $l \geq V_{RVE}^{1/3} \geq l_c$ , at which tissue properties and behaviours can be coarse-grained. (Right) Schematic of the model at the cellular scale. Biochemical interactions between morphogens,  $A$  and  $I$ , take place inside the cell and are described by their respective turnover rate functions  $f(A, I)$  and  $g(A, I)$ .  $A$  and  $I$  are exported across the cell membrane at rates  $\lambda_{A, I}$  and imported at rates  $\gamma_{A, I}$ , respectively. In the extracellular space, both  $A$  and  $I$  spread freely by diffusion at the same rate  $D$ , or can be advected by the fluid at velocity  $v_e$ . (b) Evolution of the effective diffusion coefficient as a function of time and space scales, set by the tissue spatial structure and cell physiology. At shorter distances and times, diffusive behaviour of morphogens is described by a molecular diffusion coefficient,  $D_{\text{Fick}}$ . At intermediate space and time scales, the diffusive motion of morphogens starts to be hindered by cells and the global diffusion coefficient,  $D$ , depends of the tissue spatial organisation through  $\phi^*$ . At longer space and time scales, morphogen transport is controlled by dynamic interactions with cells (import/export, adsorption/desorption, etc) and characterised by an effective diffusion coefficient  $DK_{A, I}$  [10, 36].

typical lengthscale  $l_r$  satisfying  $l_{i,c} \ll l_r \ll l$ . Both phases are separated by cell membranes, actively regulating the interfacial exchange of water and other molecules thanks to genetically controlled transport mechanisms [25]. At the boundary of the domain, no-flux boundary conditions are imposed such that the system is considered in isolation. We present below the main steps of the model derivation, which are detailed in Supplementary Information (S.I.).

### Intracellular morphogen dynamics

Morphogens enable cell-cell communication across the tissue and determine cell fate decisions. Importantly, most known morphogens cannot directly react together and as such, have to interact “through” cells (or cell membranes) where they are produced and degraded [26]. Concentration fields of two morphogens,  $A_{i,e}(\vec{r}, t)$  and  $I_{i,e}(\vec{r}, t)$ , are thus defined separately in each phase of the system, indices  $(i, e)$  denoting intra- and extra-cellular phases, respectively. The conservation laws of the intracellular phase read:

$$\begin{aligned} \partial_t(\phi A_i) &= f(A_i, I_i) + \gamma_A A_e - \lambda_A A_i \\ \partial_t(\phi I_i) &= g(A_i, I_i) + \gamma_I I_e - \lambda_I I_i \end{aligned} \quad (1)$$

where  $\partial_t$  denotes the partial derivative with respect to time and  $\gamma_{A, I}$  (resp.  $\lambda_{A, I}$ ) the import (resp. export) rates of morphogens. We also introduce  $f$  and  $g$ , the non-linear morphogen turnover rates describing their production and degradation by cells, with a single stable equilibrium solution  $f(A_i^*, I_i^*) = g(A_i^*, I_i^*) = 0$ . Finally, we introduce the transmembrane transport equilibrium constants by  $K_A = \lambda_A/\gamma_A$  and  $K_I = \lambda_I/\gamma_I$ . Although the import/export coefficients  $K_{A, I}$  could in principle depend on morphogen concentrations, this constitutes a non-linear effect that we ignore in our linear theory.

### Extracellular fluid dynamics

Next, we write a mass conservation equation for the incompressible fluid contained in the tissue interstitial space between cells:

$$\partial_t \phi - \nabla \cdot ((1 - \phi)v_e) = \frac{\phi_h(A_i, I_i) - \phi}{\tau} \quad (2)$$

where  $v_e$  is the velocity of the extracellular fluid. The right-hand side of this equation describes the fact that cells actively regulate their relative volume fraction to an homeostatic value  $\phi_h(A_i, I_i)$  at a timescale  $\tau$  [27]. Note that, (2) with  $v_e \neq 0$  implies a recirculation of internal fluid, via gap junctions [28] (*cf.* S.I for details).

As detailed below, we assume that local cellular morphogen concentrations have an influence on the volume fraction  $\phi$  which couples tissue mechanics to morphogens concentration fields in our theory. At linear order, this coupling generically reads  $\phi_h(A_i, I_i) = \phi^* + \chi_A(A_i - A_i^*)/A_i^* + \chi_I(I_i - I_i^*)/I_i^*$  where we denote  $\phi^* = \phi_h(A_i^*, I_i^*)$ , the equilibrium cell volume fraction, and the  $\chi_{A, I}$  terms account for the sensitivity of cell volume to intracellular morphogen concentrations. Such a mechano-chemical effect on the tissue packing fraction,  $\phi$ , can occur either via the active control of individual cell volume [27] or through the active balance between cell proliferation and loss (*cf.* S.I. for details), with  $\chi_{A, I} > 0$  for morphogens acting as growth factors and  $\chi_{A, I} < 0$  for morphogens working as growth inhibitors. This is a reasonable assumption, as a number of morphogens involved in cell fate decisions can act as growth factor/inhibitors [29, 30]. Moreover, *in vitro* experiments have shown that cells, upon exposure to factors such as FGF or EGF, elicit a series of signaling mediated responses involving an increase in transmembrane ion flux [31], cell volume changes [27] and subsequent cell growth/division [32]. Moreover, during digits pattern formation in the limb bud, which has been

proposed to rely on a Turing instability, morphogens such as BMP participate in both the reaction-diffusion scheme [9] and in morphogenetic events such as cell condensation [33], with skeletal formation being associated with large cell volume fraction changes [34]. The cell volume fraction is thus highly modulated in space and time, concomitantly with morphogen pattern formation [33], advocating for the need of a global mechano-chemical theory taking into account both effects.

### Extracellular morphogen dynamics

Morphogens, once secreted by cells, are transported by diffusion and advection in the extracellular fluid:

$$\begin{aligned} \partial_t((1-\phi)A_e) + \nabla \cdot ((1-\phi)A_e v_e - D\nabla A_e) &= -\gamma_A A_e + \lambda_A A_i \\ \partial_t((1-\phi)I_e) + \nabla \cdot ((1-\phi)I_e v_e - D\nabla I_e) &= -\gamma_I I_e + \lambda_I I_i \end{aligned} \quad (3)$$

where  $D$  is the global Fickian diffusion coefficient of both morphogens depending on tissue packing and tortuosity [10, 35–37]. As we are interested in a linear theory, we consider here  $D = D(\phi^*)$  as a constant. We neglect here, for the sake of simplicity, phenomena such as extracellular morphogen degradation or the influence of extracellular morphogen concentrations on reaction terms, as they do not modify qualitatively the dynamics (*cf.* S.I. for details). Note that one could also take into account, at the mesoscopic level, some effective non-local interactions such as cell-cell communication via long-ranged cellular protrusions [38]. This may require to consider spatial terms in (1) to introduce an additional characteristic lengthscale from non-local cell-cell transport.

### Mechanical behaviour of the cellular phase

To complete our description of a multicellular tissue, we need to specify a relation linking cell volume fraction to interstitial fluid velocity, for which we use a poroelastic description of the tissue. Taking an homogeneous tissue as reference state, locally changing the cell volume fraction creates elastic stresses and gradients of interstitial fluid pressure  $p$ , which in turn drive interstitial fluid flows. We show (*cf.* S.I. for details) that this reduces to a simple Darcy’s law between cell volume fraction and fluid flow [39]:

$$(1-\phi)v_e = -\frac{\kappa}{\eta}\nabla p = D_m \nabla \phi. \quad (4)$$

This relation introduces the hydrodynamic diffusion coefficient of the extracellular fluid,  $D_m = K\kappa/\eta$ , a key mechanical parameter of the model which feeds back on the reaction diffusion dynamics (3), with  $\kappa$  the tissue permeability,  $K$  the elastic drained bulk modulus and  $\eta$  the fluid viscosity. The hydrodynamic length scale  $l_m = \sqrt{D_m\tau}$  is associated to such fluid movement. The applicability of such theory to describe the mechanical response of biological tissues has been thoroughly investigated in various contexts [40–42]. Importantly, we only explore here the simplest tissue rheology for the sake of simplicity and concision. Nevertheless, we also investigate in the S.I. the role of growth and plastic cell rearrangements and show that they can be readily incorporated in our model, leading to different types of patterning instabilities. However,

we would like to highlight here that the results presented thereafter are all robust to small to intermediate levels of tissue rearrangements.

### Model of an active biphasic tissue

Eqs.(1-4) define a full set of equations describing the chemo-mechanical behaviour of an active biphasic multicellular tissue (*cf.* S.I. for details on mathematical formulation). To provide clear insights on the biophysical behaviour of the system, we focus on a limit case where  $\gamma_{A,I} \gg \lambda_{A,I} \gg f, g$  such that  $K_{A,I} \ll 1$ . This corresponds to an ubiquitous biological situation where rates of membrane transport are order of magnitudes faster than transcriptionally controlled morphogen turnover rates, and where endocytosis occurs at a much faster rate than exocytosis. In that case, the relations  $A_e \simeq K_A A_i$  and  $I_e \simeq K_I I_i$  always hold and even if a significant fraction of morphogens is immobilized inside the cells [10], the import/export terms cannot be neglected as  $\gamma_{A,I}$  are very large, so that  $\gamma_A(A_e - K_A A_i)$  and  $\gamma_I(I_e - K_I I_i)$  are indeterminate quantities (*cf.* S.I. for details). Thus, summing both internal (1) and external (3) conservation laws, we obtain a simplified description of the system (*cf.* S.I. for details):

$$\begin{aligned} \partial_t(\phi A_i) + \nabla \cdot (A_i K_A D_m \nabla \phi - K_A D \nabla A_i) &= f(A_i, I_i) \\ \partial_t(\phi I_i) + \nabla \cdot (I_i K_I D_m \nabla \phi - K_I D \nabla I_i) &= g(A_i, I_i) \\ -l_m^2 \Delta \phi + \phi &= \phi_h(A_i, I_i). \end{aligned} \quad (5)$$

Non-dimensionalizing times with  $\tau_A$  associated with the degradation of  $A_i$  in the morphogen turnover functions  $f$  and  $g$  and lengths with  $l_A = \sqrt{K_A D \tau_A}$  we find that (5) is controlled by a few non-dimensional parameters:  $K_I/K_A$  describes the mismatch of morphogen membrane transport,  $D_m/D$  compares the global hydrodynamic and Fickian diffusion of the morphogens,  $\tau/(K_A \tau_A)$  compares the response time of cell volume fraction to the effective morphogen turnover rate, and  $\chi_A$  and  $\chi_I$  account for the sensitivity of  $\phi$  to morphogen levels. Using this restricted set of parameters encapsulating the behaviour of the model, we investigate several of its biologically relevant limits, demonstrating that they provide independent routes towards tissue patterning.

### Orders of magnitude on morphogen transport

In the simplest limit of the model, the cell fraction remains constant,  $\phi = \phi^*$ , which is valid if the effect of the morphogens on  $\phi$  is very small compared to the restoring mechanical forces (i.e.  $\chi_{A,I} \ll 1$ ). The model then reduces to Turing’s original system, with diffusion coefficients being renormalised by morphogens transmembrane transport equilibrium constants,  $K_{A,I} D$ , similar to results obtained in [10, 12]. This implies that even species with similar  $D$ , can exhibit effective diffusion coefficients widely differing from each other on longer timescales and produce Turing patterns when  $K_I \gg K_A$  (*cf.* S.I. for details).

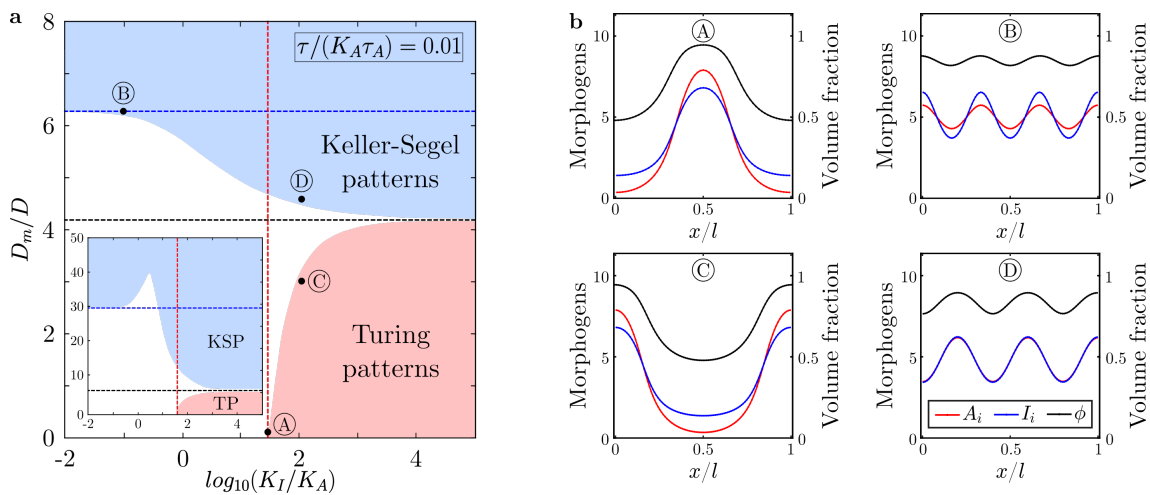

**Figure 2: Linear stability analysis and numerical simulations of pattern formation in active biphasic tissues.** (a) Phase diagram of (5) in the  $(K_I/K_A, D_m/D)$  parameter space for  $\tau/(K_A\tau_A) = 0.01$  and  $\tau/(K_A\tau_A) = 0.1$  (inset). The red and blue dashed lines correspond to analytical thresholds of instability (given in the text) for Turing and Keller-Segel patterns respectively. The black dashed line is the analytical phase boundary between both regimes in the limit  $K_I \gg K_A$  given by  $\chi_A = D/D_m + \tau/(\tau_A K_A)$ . This limit is shifted up when the ratio  $\tau/\tau_A K_A$  is increased, while a pronounced notch appears in the “Keller-Segel patterns” domain (see inset). Other parameters are set to  $\chi_A = 0.25$ ,  $\chi_I = 0$ ,  $\tau_I/(K_A\tau_A) = 0.2$ ,  $K_A\tau_A\rho = 1$ ,  $\phi^* = 0.85$  and large tissue size ( $l_A/l \ll 1$ ). (b) 1D numerical simulations of (5) with random initial conditions for several choices of parameters identified by letters A, B, C & D, with  $l_A/l = 0.1$ .

In Fig. 1(b), we depict scaling arguments for the changes in effective diffusion coefficient at various time/length scales, associated both with tissue structure and import/export kinetics [36]. At small timescales, diffusion is characterised by a local Fickian diffusion coefficient, theoretically expected to be of the order of  $D_{\text{Fick}} \approx 10^{-11} \text{m}^2 \text{s}^{-1}$ , in line with fluorescence correlation spectroscopy (FCS) measurements [8, 10, 26]. This occurs across a typical cell-to-cell distance of  $l_i \approx 10^{-7} - 10^{-9} \text{m}$  [43, 44], so that this regime is valid for time scales below  $l_i^2/D_{\text{Fick}} \approx 10^{-2} - 10^{-6} \text{s}$ , which is much faster than the typical import/export kinetics of  $1/\gamma_{A,I} \approx 10^1 - 10^2 \text{s}$  [45]. At intermediate timescales, the coefficient of diffusion needs to be corrected by volume exclusion effects. This effect can be very large, as the cell volume fraction can be close to one. An upper bound for global diffusion can be computed, irrespective of the microscopic details of tissue geometry, as  $D(\phi^*) \leq D_{\text{Fick}}(1 - \phi^*)/(1 + \phi^*/2)$  [35], which would suggest, in the case of  $\phi^* \approx 0.8 - 0.9$ , that it should be around an order of magnitude smaller than local diffusion,  $D(\phi^*) \approx 10^{-12} \text{m}^2 \text{s}^{-1}$ . Finally, at the time scales larger than  $1/\gamma_{A,I}$  described by the present model, the diffusion is decreased further by a factor  $K_{A,I}$ , i.e. by the relative concentrations of morphogens “trapped” cellularly (i.e. a 1 – 10 ratio). This is consistent with effective diffusion coefficients  $DK_{A,I} \approx 10^{-12} - 10^{-13} \text{m}^2 \text{s}^{-1}$  measured from tissue-wide fluorescence recovery after photobleaching (FRAP) over minutes to hours time scales [8, 26].

Interestingly, Lefty diffusion coefficient in the zebrafish embryo varies only by a factor 2 between FCS (local) and FRAP (effective) measurements [10], which is paradoxical given the large cell volume fraction inferred in this system ( $\phi^* \approx 0.8 - 0.9$  [10]). Indeed, even in the best-case scenario of  $K_{\text{Lefty}} = 1$  (i.e. all morphogens being extracellular), the aforementioned upper bound would impose at least a factor 10 difference. These

measurements are thus in apparent contradiction with the hypothesis of a purely passive extracellular diffusion, raising the intriguing possibility of active contributions to morphogen transport. Moreover, from a purely theoretical perspective, quite stringent conditions on the ratio of intracellular and extracellular morphogen levels are still necessary for Turing pattern formation under this rescaled passive morphogen transport scenario. Exploring further the effect of a variable cell volume fraction  $\phi$ , we demonstrate that coupling morphogen dynamics and tissue mechanics relaxes this limitation via active transport of morphogens.

## Turing-Keller-Segel instabilities

To assess the regions in parameter space where stable patterns can form in our mechano-chemical framework, we perform a linear stability analysis on (5) (cf. S.I.). Here, we consider a classical Gierer-Meinhardt activator-inhibitor scheme [2]:  $f(A, I) = \rho A^2/I - A/\tau_A$  and  $g(A, I) = \rho A^2 - I/\tau_I$ , where  $\rho$  is the rate of activation and inhibition and  $\tau_{A,I}$  the timescales of degradation of  $A$  and  $I$  [2] and the particular case of a single morphogen capable of increasing  $\phi_h$  ( $\chi_A > 0$ ,  $\chi_I = 0$ ).

In the phase diagram in Fig. 2 (a), we show that two distinct instabilities can be captured by this simplified theory. The first instability, identified here as “Turing patterns”, corresponds to a classical Turing instability, where diffusive transport of morphogens dominates over their advection by interstitial fluid ( $D_m \ll D$ ) and with instability threshold given by  $K_I\tau_I - K_A\tau_A > 2\sqrt{\tau_A\tau_I K_A K_I}$  for  $l_A/l \ll 1$  (dashed red line on Fig. 2 (a)) which, as expected, is always true regardless of the value of  $\tau_{A,I}$  if  $K_I \gg K_A$ . The second instability in this phase diagram, labelled “Keller-Segel patterns” [46] is highly generic for active transport, and can even occur for a single morphogen. In this limit, patterning occurs



if  $\sqrt{\chi_A} > \sqrt{D/D_m} + \sqrt{\tau/(\tau_A K_A)}$  when  $l_A/l \ll 1$  so that the volume fraction sensitivity  $\chi_A$  is above a critical value (dashed blue line in Fig. 2 (a), which captures well the phase boundary in the limit  $K_A \gg K_I$ , although the instability occurs generically for any value of  $K_{A,I}$ ). The physical origin of this instability is similar to active fluid instabilities [19,24,47–49]: local stochastic changes in morphogen concentration result in cell patterning changes. If these changes are associated with an increase in cell volume, fluid must flow inside cells, resulting in large-scale extracellular fluid flows from regions of low to high morphogen concentration, resulting in a positive feedback loop (Fig. 3 (a)).

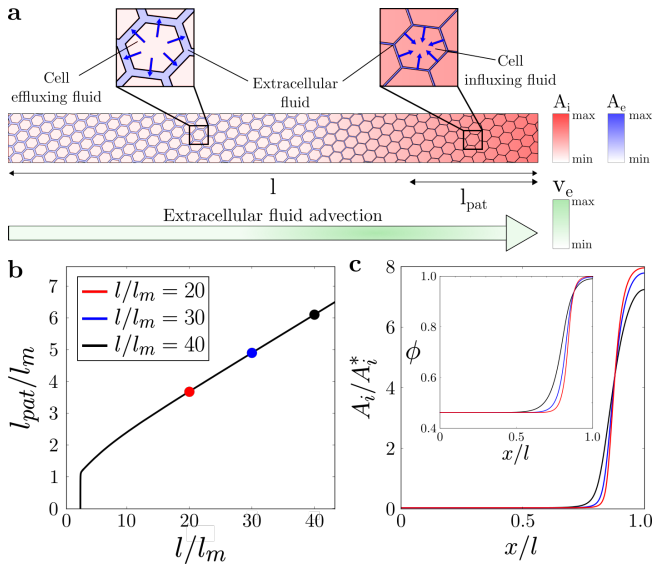

Figure 3: **Scaling properties of the Keller-Segel instability with one morphogen.**(a) Schematic of the Keller-Segel instability in a 1D tissue. Morphogens gradients generate cell volume fraction gradients (via local fluid exchanges, blue arrows in inset), which in return cause mechanically-induced self-amplifying extracellular flows that advect morphogens from morphogen-poor to morphogen-rich regions (green arrow). (b) Normalized pattern size (cf. S.I. for definition) as a function of system size in the single morphogen case with  $f = 0$ . (c) Morphogen concentration and cell packing fraction (inset) profiles remain quasi-stationary as system size increases. Parameters are  $\chi_A = 0.25$ ,  $D_m/D = 10$  and  $\phi^* = 0.85$

Thus, coupling tissue mechanical behaviour to morphogen reaction-diffusion provides, via the generation of advective fluid flows, a new route to stable pattern formation with a single morphogen. Moreover, this instability has two remarkable features. First, it only requires the presence of a single morphogen (cf. S.I. for details) which could correspond to many practical situations where a pair of activator/inhibitor has not been clearly identified, for instance the role of Wnt in the antero-posterior pattern of planarians [51]. Second, it possesses spatial scaling properties regarding to its fundamental mode, as compared to a Turing instability. Indeed, when morphogen turnover rate is small compared to its effective hydrodynamic and Fickian diffusion ( $f \rightarrow 0$ ), the fundamental mode, i.e. a single two-zones pattern, is the most unstable in a robust manner, given that morphogen turnover  $f$  stabilises specifically this

mode (cf. S.I. for details), whereas in the case of a Turing instability, this would require fine-tuning and marginally stable reaction kinetics. We illustrate such a scaling property in Fig. 3. This mechanism could potentially apply to situations where a binary spatial pattern is independent of system size such as dorso-ventral or left-right patterns in early vertebrate embryos [8,10], or planarian antero-posterior pattern [50,51]. If so, it could provide a simpler alternative to previously proposed mechanisms involving additional species or complex biochemical signaling pathways [8,50].

Importantly, simple estimates can be used to demonstrate the biological plausibility of such mechanical effects during morphogenetic patterning. A key parameter driving Keller-Segel instabilities is the hydrodynamic diffusion coefficient  $D_m$ , which can be estimated from values of the drained bulk modulus  $K \approx 10^4$  Pa [40, 52] and the tissue permeability upper bound [35]  $\kappa \approx l_i^2(1 - \phi^*)/(1 + \phi^*/2)$  with  $l_i \approx 10^{-7} - 10^{-9}$ m and  $\phi^* \approx 0.85$  as above. Using  $\eta \approx 10^{-3}$  Pa.s (water viscosity), we obtain  $D_m \approx 10^{-12} - 10^{-8}$  m<sup>2</sup>s<sup>-1</sup>, showing that the hydrodynamic diffusion can be similar or even much larger than Fickian diffusion. In agreement with typical timescales involved in regulatory volume increase or decrease of cells following an osmotic perturbation [27], we estimate that  $\tau \approx 10^2$  s, while morphogen turnover time scale has been measured as  $\tau_A \approx 10^4 - 10^5$  s [10]. With  $K_A \approx 0.1$  as above, we obtain  $\tau/(K_A \tau_A) \approx 0.01 - 0.1$ , which is used in Fig. 2, and displays broad regions of instability, although parameters like sensitivities  $\chi_{A,I}$  would need to be better assessed *in vivo* in future works.

## Cross-diffusion Turing instabilities

Finally, we investigate the behaviour of our model ((5)), when cell fraction sensitivity to morphogen concentration is negative ( $\chi_{A,I} < 0$ ), eliminating the possibility of up-hill morphogen diffusion at the origin of the Keller-Segel instability. We also consider that  $f$  and  $g$  do not necessarily follow an activator-inhibitor kinetics, but any possible interaction scheme between two morphogens. For mathematical clarity on the physical nature of the instability studied here, we make the simplifying assumptions that  $\tau = 0$  and  $\chi_{A,I} \ll 1$ , with  $D \sim D_m \chi_{A,I}$  in (5). This relates to a realistic biological situation, where cell volume fraction relaxes rapidly after perturbation and depends weakly on morphogen levels, yielding:

$$\begin{aligned} \phi^* \partial_t A_i + \nabla \cdot (A_i K_A D_m \nabla \phi_h(A_i, I_i) - K_A D \nabla A_i) &= f(A_i, I_i) \\ \phi^* \partial_t I_i + \nabla \cdot (I_i K_I D_m \nabla \phi_h(A_i, I_i) - K_I D \nabla I_i) &= g(A_i, I_i). \end{aligned} \quad (6)$$

In this limit, the conditions for linear stability of the homogeneous solution are exactly the ones of a classical Turing system but with cross-diffusion terms (cf. S.I.). Such a scenario has been studied in the framework of monophasic reaction-diffusion systems with *ad hoc* cross-diffusion terms [53], which arise generically in various chemical and biological systems [54]. Our work thus provides a particular biophysical interpretation of these terms in multicellular tissues, which we show to originate from intrinsically mechano-chemical feedbacks between morphogen dynamics and tissue mechanics.

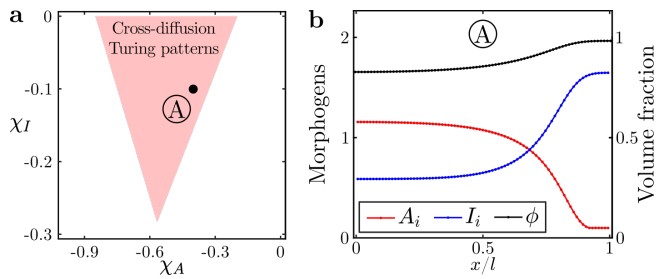

**Figure 4: Pattern formation for cross-diffusion Turing instabilities.** (a) Phase diagram of (5) in the  $(\chi_A, \chi_I)$  space obtained by numerical linear stability analysis. Parameters are  $\tau/(K_A \tau_A) = 0.01$ ,  $D_m/D = 10$ ,  $K_I/K_A = 10$ ,  $\tau_I/(K_A \tau_A) = 0.9$ ,  $\phi^* = 0.85$  and  $l_A/l \ll 1$ . (b) 1D numerical simulation of (5) using a simple inhibitor-inhibitor reaction scheme (*cf.* S.I. for details).

As shown in [53], such cross diffusion terms result in a dramatic broadening of the phase space for patterns. In particular, any two-morphogen reaction scheme can now generate spatial patterns and not just the classical activator-inhibitor schemes. For instance, it becomes possible to obtain patterns with activator-activator or inhibitor-inhibitor kinetics similar to those observed in numerous gene regulatory networks or signaling pathways involved in cell fate decisions [55]. We illustrate this result by considering an inhibitor-inhibitor kinetic scheme, which cannot yield patterns in the classical Turing framework. Directly using our model (5), we demonstrate analytically and numerically the existence of a region of stable patterns, where a cross-diffusion driven Turing instability can develop (Fig. 4).

## Discussion

In this paper, we have introduced a generalisation of Turing’s work on pattern formation in biological tissues by coupling equations describing the structure and mechanical properties of multicellular tissues with a classical reaction-diffusion scheme. In particular, our work highlights two important features of multicellular tissues, as of yet largely unexplored in this context: their biphasic nature, *i.e.* the fact that morphogen production/degradation is controlled by cells while transport takes place extracellularly requiring active membrane exchanges (effectively rescaling diffusion [10, 12]), and the possibility for active large scale flows to develop within the tissue interstitial space. We demonstrate that coupling tissue cell volume fraction to local morphogen levels provides a biophysically realistic route towards two qualitatively different modes of patterning instability. First, a Keller-Segel type instability where advective flows feed back on the concentration of a single (or various) morphogen(s) to drive spatial pattern formation, and a second type of instability, where resulting advective flows create cross-diffusion terms for morphogens. This relaxes the condition that import/export ratios of morphogens should be very different for a pattern to form and also renders the patterning mechanism robust and weakly dependent on morphogens reaction scheme. In this

respect, our approach, which has the advantage of parsimony, taking into account the manifest biphasic nature of multicellular tissues, is complementary to others which have been proposed to solve limitations of Turing’s model by introducing additional morphogen regulators [15, 50], and also displays connections with recent development in the mechano-chemical descriptions of active fluids such as the cell cytoskeleton [19, 20]. Nevertheless, further quantitative experiments would be needed to probe the role of transmembrane import/export kinetics or similar phenomena such as transmembrane signaling [12], morphogen adsorption/desorption on cell surface [10] and long-distance cellular protrusions [38], on effective morphogen diffusion rates. Systems such as digits patterning, where cell volume fraction spatial pattern appears concomitant to morphogen patterns [33], or planarian antero-posterior patterning, where pairs of activator/inhibitor have not been clearly identified [51], provide possible testing grounds for our model. Interestingly, we show that the proposed mechanism has robust scaling properties for the fundamental mode, compared to conventional Turing models, which could have also interesting implications concerning recent experimental evidences for robust scaling of the Nodal/Lefty pattern in the early zebrafish embryo [56].

Interestingly, large-scale extracellular fluid flows have been increasingly observed during embryo development, not only in the classical case of cilia driven flows [58], but also due to mechanical forces arising from cellular contractions as well as osmotic and pro-viscous effects [59–61]. Furthermore, active flows have been proven to be crucial for patterning events such as left-right asymmetry emergence in zebrafish [58], strengthening the biological plausibility of the physical effects discussed in our paper, and calling for a more systematic understanding of passive vs. active transport mechanisms during embryonic pattern formation. A key assumption underlying these last two results is our proposed relationship between morphogen levels (*i.e.* cell state) and cell volume fraction in tissues, coupling biochemistry and mechanics in the model via advective transport, and based on the dual role of morphogens in patterning and cell growth/volume regulation [29–31, 57]. Although active transport coupled to mechanics has remained overlooked in the context of Turing patterns, it is interesting to note that effective tissue-wide diffusion coefficients measured *in vivo* are larger than expected from upper bounds implied by cell volume exclusion within the tissue [10], which would need to be interpreted through a mechano-chemical theory of morphogen transport. Whether biological examples of Turing patterning instabilities, such as left-right or dorso-ventral patterning, digits pattern formation or skin appendages patterns are causally associated with concomitant changes in cell volume and/or cell packing remains a result to be experimentally investigated.

## Methods

Methods, including any associated references, are available in the S.I section.

## Acknowledgments

A.H would like to thank the University of Cambridge for the award of a David Crighton Fellowship and the Wellcome Trust for the award of an Interdisciplinary Research Fellowship. P.R. acknowledges support from a CNRS-Momentum grant. The authors would like to thank Benjamin Simons, Anna Kicheva, David Jörg, Tom Hiscock, Pau Formosa-Jordan, Erik Clark and Lev Truskinovsky for useful discussions and insightful comments.

## References

- [1] Turing AM (1952) The chemical basis of morphogenesis. *Philosophical Transactions of the Royal Society B: Biological Sciences* **237**(641):37-72.
- [2] Gierer A and Meinhardt H (1972) A theory of biological pattern formation. *Kybernetik* **12**(1):30-39.
- [3] Murray JD (2003) *Mathematical Biology* (Springer-Verlag, Berlin, third edition).
- [4] Kondo S and Miura T (2010) Reaction-diffusion model as a framework for understanding biological pattern formation. *Science* **329**(599):1616-1620.
- [5] Marcon L and Sharpe J (2012) Turing patterns in development: what about the horse part? *Current Opinion in Genetics & Development* **22**(6):578-584.
- [6] Sick S, Reinker S, Timmer J and Schlake T (2006) WNT and DKK determine hair follicle spacing through a reaction-diffusion mechanism. *Science* **314**(5804):1447-1450.
- [7] Economou AD *et al.* (2012) Periodic stripe formation by a Turing mechanism operating at growth zones in the mammalian palate. *Nature Genetics* **44**(3):348-351.
- [8] Inomata H, Shibata T, Haraguchi T and Sasai Y (2013) Scaling of dorsal-ventral patterning by embryo size-dependent degradation of Spemann's organizer signals. *Cell* **153**(6):1296-311.
- [9] Raspopovic J, Marcon L, Russo L and Sharpe J (2014) Modeling digits. Digit patterning is controlled by a Bmp-Sox9-Wnt Turing network modulated by morphogen gradients. *Science* **345**(6196):566-570.
- [10] Muller P *et al.* (2012) Differential diffusivity of Nodal and Lefty underlies a reaction-diffusion patterning system. *Science* **336**(6082):721-724.
- [11] Lengyel I and Epstein IR (1991) Modeling of Turing structures in the chlorite-iodide-malonic Acid-starch reaction system. *Science* **251**(4994): 650-2.
- [12] Rauch EM and Millonas MM (2004) The role of trans-membrane signal transduction in turing-type cellular pattern formation. *Journal of Theoretical Biology* **226**(4):401-407.
- [13] Castets V, Dulos E, Boissonade J and De Kepper P (1990) Experimental evidence of a sustained standing Turing-type nonequilibrium chemical pattern. *Physical Review Letters* **64**(24):2953-2956.
- [14] Rovinsky AB and Menzinger M (1993) Chemical instability induced by a differential flow. *Physical Review Letters* **69**(8):1193-1196.
- [15] Marcon L, Diego X, Sharpe J and Muller P (2016) High-throughput mathematical analysis identifies Turing networks for patterning with equally diffusing signals. *eLife* **5**:e14022.
- [16] Diego X, Marcon L, Muller P and Sharpe J (2018) Key Features of Turing Systems Are Determined Purely by Network Topology. *Physical Review X* **8**(2):21071.
- [17] Oster GF, Murray JD and Harris AK (1983) Mechanical aspects of mesenchymal morphogenesis. *Development* **78**:83-125.
- [18] Oster GF, Murray JD and Maini PK (1985) A model for chondrogenic condensations in the developing limb: the role of extracellular matrix and cell tractions. *Development* **89**:93-112.
- [19] Bois JS, Julicher F and Grill SW (2011) Pattern formation in active fluids. *Physical Review Letters* **106**:028103.
- [20] Howard J, Grill SW and Bois JS (2011) Turing's next steps: the mechanochemical basis of morphogenesis. *Nature Review Molecular and Cellular Biology* **12**(6):392-398.
- [21] Hiscock TW and Megason SG (2015). Mathematically guided approaches to distinguish models of periodic patterning. *Development* **142**:409-419.
- [22] Naganathan SR and Oates AC (2017) Mechanochemical coupling and developmental pattern formation. *Current Opinion in Systems Biology* **5**:104-111.
- [23] Gross P, Kumar KV and Grill SW (2017) How Active Mechanics and Regulatory Biochemistry Combine to Form Patterns in Development. *Annual Review of Biophysics* **46**:337-356.
- [24] Weber CA, Rycroft CH and Mahadevan L (2011) Differential activity-driven instabilities in biphasic active matter. *Physical Review Letters* **120**:248003.
- [25] Bokel C and Brand M (2014) Endocytosis and Signaling during Development. *Cold Spring Harbor Perspectives in Biology* **6**:a017020.
- [26] Kicheva A, Bollenbach T, Wartlick O, Julicher F and Gonzalez-Gaitan M (2012) Investigating the principles of morphogen gradient formation: from tissues to cells. *Current Opinion in Genetics & Development* **22**(6):527-532.

- [27] Hoffmann EK, Lambert IH and Pedersen SF (2009) Physiology of cell volume regulation in vertebrates. *Physiological Reviews* **89**(1):193-277.
- [28] Zehnder SM, Suaris M, Bellaire MM and Angelini TE (2015) Cell Volume Fluctuations in MDCK Monolayers. *Biophysical Journal* **108**(2):247–250.
- [29] Smith JC (1981) Growth factors and pattern formation, *Journal of Embryology and Experimental Morphology* **65**:187-207.
- [30] Ginzberg MB, Kafri R and Kirschner M (2015) On being the right (cell) size. *Science* **348**(6236):1245075.
- [31] Reuss L, Cassel D, Rothenberg P, Whitele B, Mancuso D and Glaser L (1986) Mitogens and ion fluxes. In *Current topics in membranes and transport* (Vol. 27, pp. 3-54). Academic Press.
- [32] Zetterberg A, Engstrom W and Dafgird E (1984) The relative effects of different types of growth factors on DNA replication, mitosis, and cellular enlargement. *Cytometry* **5**(4):368-375.
- [33] Bénazet JD, Pignatti E, Nugent A, Unal E, Laurent F and Zeller R (2012) Smad4 is required to induce digit ray primordia and to initiate the aggregation and differentiation of chondrogenic progenitors in mouse limb buds. *Development* **139**(22):4250-4260.
- [34] Cooper KL, Oh S, Sung Y, Dasari RR, Kirschner MW and Tabin CJ (2013) Multiple phases of chondrocyte enlargement underlie differences in skeletal proportions. *Nature* **495**(7441):375.
- [35] Hashin Z and Shtrikman S (1962) A variational approach to the theory of the effective magnetic permeability of multiphase materials. *Journal of applied Physics* **33**(10):3125-3131.
- [36] Grimm O, Coppey M and Wieschaus E (2010) Modelling the Bicoid gradient. *Development*, **137**(14): 2253-2264.
- [37] Bear J (1989) *Dynamics of Fluids in Porous Media* (Dover, New-York, new edition).
- [38] Kondo S (2017) An updated kernel-based Turing model for studying the mechanisms of biological pattern formation. *Journal of Theoretical Biology* **414**:120-127.
- [39] Coussy O (2004) *Poromechanics* (Wiley, London, first edition).
- [40] Netti PA, Berk DA, Swartz MA, Grodzinsky AJ and Jain RK (2000) Role of extracellular matrix assembly in interstitial transport in solid tumors. *Cancer research* **60**(9):2497-2503.
- [41] Roose T, Netti PA, Munn LL, Boucher Y and Jain RK (2003) Solid stress generated by spheroid growth estimated using a linear poroelasticity model? *Microvascular research* **66**(3):204-212.
- [42] Fraldi M and Carotenuto AR (2018) Cells competition in tumor growth poroelasticity. *Journal of the Mechanics and Physics of Solids* **112**:345-367.
- [43] Tschumperlin DJ, Dai G, Maly IV, Kikuchi T, Laiho LH, McVittie AK, Kamm RD and Drazen JM (2004) Mechanotransduction through growth-factor shedding into the extracellular space. *Nature*, **429**(6987):83-86.
- [44] Barua D, Parent SE and Winklbauer R (2017) Mechanics of Fluid-Filled Interstitial Gaps. II. Gap Characteristics in Xenopus Embryonic Ectoderm. *Biophysical journal* **113**(4):923-936.
- [45] Smith CB and Betz WJ (1996) Simultaneous independent measurement of endocytosis and exocytosis. *Nature* **380**(6574): 531-534.
- [46] Keller EF and Segel LA (1970) Initiation of slime mold aggregation viewed as an instability. *Journal of theoretical biology* **26**(3):399-415.
- [47] Recho P, Putelat T and Truskinovsky L (2015) Mechanics of motility initiation and motility arrest in crawling cells. *Journal of the Mechanics and Physics of Solids* **84**:469-505.
- [48] Recho P, Putelat T and Truskinovsky L (2013) Contraction-driven cell motility. *Physical Review Letters* **111**(10):108102.
- [49] Hannezo E, Dong B, Recho P, Joanny JF and Hayashi S (2015) Cortical instability drives periodic supracellular actin pattern formation in epithelial tubes. *Proceedings of the National Academy of Sciences* **112**(28):8620-8625.
- [50] Werner S, Stuckemann T, Amigo MB, Rink JC, Julicher F and Friedrich BM (2015) Scaling and regeneration of self-organized patterns. *Physical Review Letters* **114**(13): 138101.
- [51] Stuckemann T, Cleland JP, Werner S, Vu HTK, Bayersdorf R, Liu SY, ... and Rink JC (2017) Antagonistic self-organizing patterning systems control maintenance and regeneration of the anteroposterior axis in planarians. *Developmental Cell* **40**(3):248-263.
- [52] Dolega ME, Delarue M, Ingremeau F, Prost J, Delon A and Cappello G (2017) Cell-like pressure sensors reveal increase of mechanical stress towards the core of multicellular spheroids under compression. *Nature Communications* **8**:14056.
- [53] Madzvamuse A, Ndakwo HS and Barreira R (2015) Cross-diffusion-driven instability for reaction-diffusion systems: alysis and simulations. *Journal of Mathematical Biology* **70**(4):709-743.
- [54] Vanag VK and Epstein IR (2009) Cross-diffusion and pattern formation in reaction-diffusion systems. *Physical Chemistry Chemical Physics* **11**:897-912.



- [55] Zhou JX and Huang S (2011) Understanding gene circuits at cell-fate branch points for rational cell reprogramming. *Trends in Genetics* **27**(2):55-62.
- [56] Almuedo-Castillo, M., Blassle, A., Morsdorf, D., Marcon, L., Soh, G. H., Rogers, K. W., and Muller, P. (2018). Scale-invariant patterning by size-dependent inhibition of Nodal signalling. *Nature cell biology*, 20(9), 1032.
- [57] Conlon I and Raff M (1999) Size control in animal development. *Cell* **96**(2):235-44.
- [58] Freund JB, Goetz JG, Hill KL and Vermot J (2012) Fluid flows and forces in development: functions, features and biophysical principles. *Development* **139**(7):1229-1245.
- [59] Krens SG, Veldhuis JH, Barone V, Capek D, Maitre J-L, Brodland GW and Heisenberg C-P (2017) Interstitial fluid osmolarity modulates the action of differential tissue surface tension in progenitor cell segregation during gastrulation. *Development* **144**(10):1798-1806.
- [60] Ruiz-Herrero T, Alessandri K, Gurchenkov BV, Nassoy P and Mahadevan L (2017) Organ size control via hydraulically gated oscillations. *Development* **144**(23):4422-4427.
- [61] Latorre E, Kale S, Casares L, Gomez-Gonzalez M, Uroz M, Valon L, ... and Trepats X (2018) Active superelasticity in three-dimensional epithelia of controlled shape. *Nature* **563**:203–208.
